# Supplementary material
Source: Springer Nature journal article supplement (https://www.springermedizin.de/resource/supplementary/12885_2008_1161_MOESM4_ESM.pdf/9471274)

CTRL

GM6001

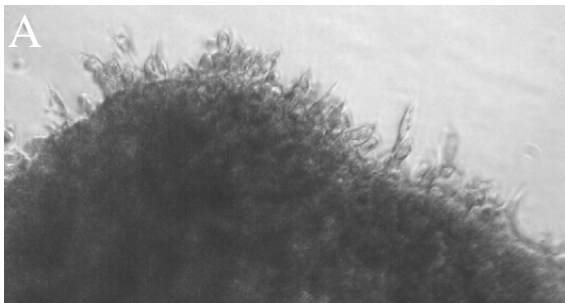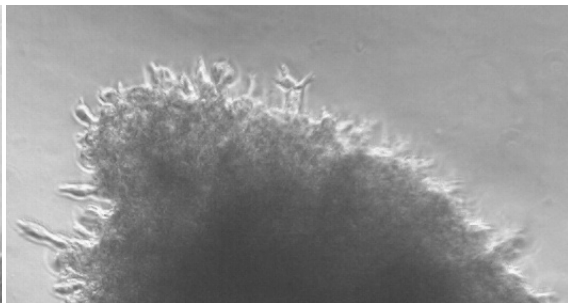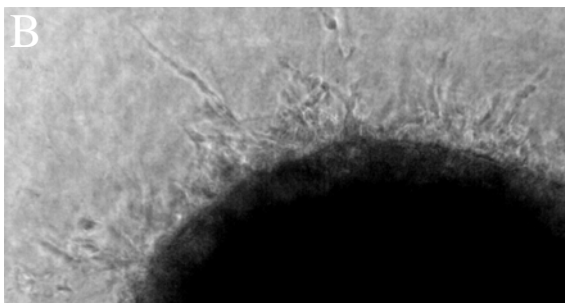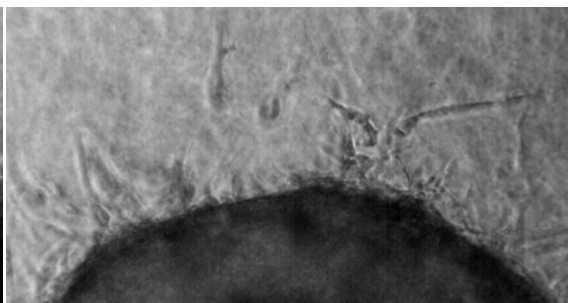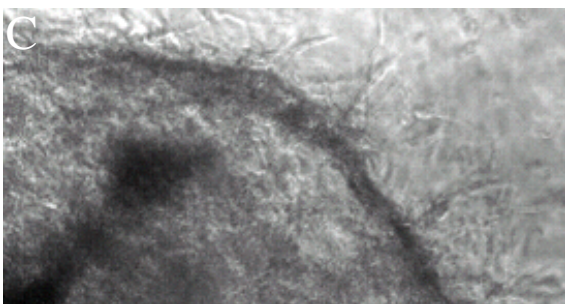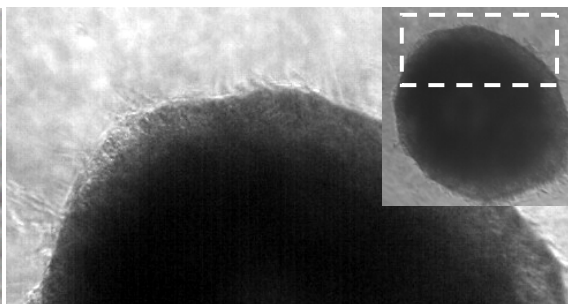

Supplement: MOESM4 [file 9471274]
